# Supplementary material for: Ketene-forming eliminations from aryl bis(4′-chlorophenyl)acetates promoted by R2NH–R2NH2+in aqueous MeCN. Change of mechanism
Source: Royal Society of Chemistry journal article supplement (doi:10.1039/b303231k), 2003-01-01
Supplement: b303231k.doc [file b303231k.doc]

**Supplementary** **Data**

**Ketene-Forming Eliminations from Aryl bis(4´-chlorophenyl)acetates Promoted by R2NH/R2NH2+ in Aqueous MeCN. Change of the Mechanism**

**Sang Yong Pyun,1) Dong Choon Lee,1) Ju Chang Kim, 1) and Bong Rae Cho,*2)**

*1)Department of Chemistry, Pukyong National University, Pusan 608-737, Korea and*

2)Department of Chemistry, Korea University, 1-Anamdong, Seoul, 136-701, Korea

Table S1. Observed Rate Constants for Elimination from (4´-ClC6H4)2CHCO2C6H4-4-NO2 (**1a**)*a*Promoted by R2NH/R2NH2+ in 70 mol % MeCN(aq) at 25.0 C.

| Entry | [R2NH] *b,c,d*, M | | *k*obs, s-1 *e,f* | | [R2NH] *b,c*,*g*, M | | *k*obs, s-1 *e,f* | |
| --- | --- | --- | --- | --- | --- | --- | --- | --- |
| 1 | | 3.0 × 10-4 | | 1.32 × 10-4 | | 6.0 × 10-4 | | 5.07 × 10-4 |
| 2 | | 4.0 × 10-4 | | 2.0 × 10-4 | | 8.0 × 10-4 | | 6.20 × 10-4 |
| 3 | | 5.0 × 10-4 | | 2.9 × 10-4 | | 1.0 × 10-3 | | 7.78 × 10-4 |
| 4 | | 1.0 × 10-3 | | 7.80 × 10-4 | | 2.0 × 10-3 | | 1.87 × 10-3 |
| 5 | | 2.0 × 10-3 | | 1.68 × 10-3 | | 4.0 × 10-3 | | 3.71 × 10-3 |
| 6 | | 3.0 × 10-3 | | 2.46 × 10-3 | | 6.0 × 10-3 | | 5.00 × 10-3 |
| 7 | | 4.0 × 10-3 | | 3.35 × 10-3 | | 8.0 × 10-3 | | 6.90 × 10-3 |
| 8 | | 6.0 × 10-3 | | 4.33 × 10-3 | | 1.2 × 10-2 | | 8.81 × 10-3 |
| 9 | | 9.0 × 10-3 | | 5.83 × 10-3 | | 1.8 × 10-2 | | 1.17 × 10-2 |
| 10 | | 1.5 × 10-2 | | 8.53 × 10-3 | | 3.0 × 10-2 | | 1.60 × 10-2 |
| 11 | | 2.0 × 10-2 | |  | | 4.0 × 10-2 | | 2.03 × 10-2 |
| 12 | | 2.5 × 10-2 | | 1.17 × 10-2 | | 5.0 × 10-2 | | 2.44 × 10-2 |
| 13 | | 3.0 × 10-2 | |  | | 6.0 × 10-2 | | 2.73 × 10-2 |
| 14 | | 4.0 × 10-2 | | 1.73 × 10-2 | | 8.0 × 10-2 | | 3.47 × 10-2 |
| 15 | | 5.0 × 10-2 | | 2.03 × 10-2 | | 1.0 × 10-1 | | 3.65 × 10-2 |
| 16 | | 1.0 × 10-1 | | 3.71 × 10-2 | | 2.0 × 10-1 | | 7.21 × 10-2 |

*a* [Substrate] = 3.0  10-5 M. *b* R2NH = Piperidine. *c*  = 0.10 M (Bu4N+Br-). *d* [R2NH]/[R2NH2+] = 0.5. *e* Average of three or more rate constants. *f* Estimated uncertainty,  5 %. *g* [R2NH]/[R2NH2+] = 1.0.

Table S2. Observed Rate Constants for Elimination from (4´-ClC6H4)2CHCO2C6H3-2-X-4-NO2(**1ad**)*a*Promoted by R2NH/R2NH2+ in 70 mol % MeCN(aq) at 25.0 C.

| Entry | [R2NH] *b,c*,*d*, M | *k*obs, s-1*e,f* | | | |
| --- | --- | --- | --- | --- | --- |
| X = H (**1a**) | X = Cl (**1b**) | X = CF3 (**1c**) | X = NO2(**1d**) |
| 1 | 6.0 × 10-4 | 4.67 × 10-5 | 3.01 × 10-4 | 1.36 × 10-3 | 1.08 × 10-2 |
| 2 | 8.0 × 10-4 | - | - | - | - |
| 3 | 1.0 × 10-3 | - | 4.73 × 10-4 | - | 1.9 × 10-2 |
| 4 | 1.4 × 10-3 | - | - | - | 2.8 × 10-2 |
| 5 | 1.8 × 10-3 | - | - | - | - |
| 6 | 2.0 × 10-3 | 6.78 × 10-5 | - | 5.06 × 10-3 | 3.53 × 10-2 |
| 7 | 3.0 × 10-3 | - | - | - | 5.40 × 10-2 |
| 8 | 4.0 × 10-3 | 1.12 × 10-4 | 1.88 × 10-3 | 1.02 × 10-2 | - |
| 9 | 6.0 × 10-3 | 1.39× 10-4 | - | 1.05 × 10-2 | - |
| 10 | 8.0 × 10-3 | 1.68 × 10-4 | - | - | - |
| 11 | 1.0 × 10-2 | - | 5.27 × 10-3 | 2.56 × 10-2 | - |
| 12 | 1.2 × 10-2 | 2.16 × 10-4 | - | - | - |
| 13 | 1.8 × 10-2 | 2.8 × 10-4 | - | - | - |
| 14 | 2.0 × 10-2 | - | 1.06 × 10-2 | - | - |
| 15 | 3.0 × 10-2 | 4.08 × 10-4 | 1.58 × 10-2 | - | - |
| 16 | 4.0 × 10-2 | - | - | - | - |
| 17 | 5.0 × 10-2 | 6.25 × 10-4 | - | - | - |
| 18 | 6.0 × 10-2 | - | - | - | - |
| 19 | 8.0 × 10-2 | 9.29 × 10-4 | - | - | - |
| 20 | 1.0 × 10-1 | 1.18 × 10-3 | - | - | - |
| 21 | 2.0 × 10-1 | 2.3 × 10-3 | - | - | - |

*a* [Substrate] = (3.0  5.0) × 10-5 M.  *b* R2NH = Morpholine.  *c* [R2NH]/[R2NH2+] = 1.0. *d*  = 0.10 M (Bu4N+Br-). *e* Average of three or more rate constants. *f* Estimated uncertainty,  5 %.

Table S3. Observed Rate Constants for Elimination from (4´-ClC6H4)2CHCO2C6H3-2-X-4-NO2 (**1ad**)*a* Promoted by R2NH/R2NH2+ in 70 mol % MeCN(aq) at 25.0 °C.

| Entry | [R2NH] *b,c,d*, M | *k*obs, s-1 *e,f* | | | |
| --- | --- | --- | --- | --- | --- |
| X = H (**1a**) | X = Cl (**1b**) | X = CF3 (**1c**) | X = NO2(**1a**) |
| 1 | 6.0 × 10-4 | 7.02 × 10-5 | 6.38 × 10-4 | 2.81 × 10-3 | 2.30 × 10-2 |
| 2 | 8.0 × 10-4 | - | - | - | - |
| 3 | 1.0 × 10-3 | - | - | - | 3.93 × 10-2 |
| 4 | 1.4 × 10-3 | - | - | - | 5.50 × 10-2 |
| 5 | 1.8 × 10-3 | - | - | - | - |
| 6 | 2.0 × 10-3 | 1.59 × 10-4 | - | 9.69 × 10-3 | 7.68 × 10-2 |
| 7 | 3.0 × 10-3 | - | - | - | 1.12 × 10-1 |
| 8 | 4.0 × 10-3 | 2.39 × 10-4 | 4.41 × 10-3 | 1.97 × 10-2 | - |
| 9 | 6.0 × 10-3 | 3.07 × 10-4 | - | 2.98 × 10-2 | - |
| 10 | 8.0 × 10-3 | 3.41 × 10-4 | - | - | - |
| 11 | 1.0 × 10-2 | - | 1.06 × 10-2 | 5.07 × 10-2 | - |
| 12 | 1.2 × 10-2 | 4.00 × 10-4 | - | - | - |
| 13 | 1.8 × 10-2 | 5.31 × 10-4 | - | - | - |
| 14 | 2.0 × 10-2 | - | 2.15 × 10-2 | - | - |
| 15 | 3.0 × 10-2 | 7.23 × 10-4 | 3.26 × 10-2 | - | - |
| 16 | 4.0 × 10-2 | - | - | - | - |
| 17 | 5.0 × 10-2 | 1.04 × 10-3 | - | - | - |
| 18 | 6.0 × 10-2 | - | - | - | - |
| 19 | 8.0 × 10-2 | 1.50 × 10-3 | - | - | - |
| 20 | 1.0 × 10-1 | 1.89 × 10-3 | - | - | - |
| 21 | 2.0 × 10-1 | 3.55 × 10-3 | - | - | - |

*a* [Substrate] = (3.0  5.0) × 10-5 M. *b* R2NH = Tetrahydroisoquinoline. *c* [R2NH]/[R2NH2+] = 1.0. *d*  = 0.10 M (Bu4N+Br-). *e* Average of three or more rate constants. *f* Estimated uncertainty,  5 %.

Table S4. Observed Rate Constants for Elimination from (4´-ClC6H4)2CHCO2C6H3-2-X-4-NO2 (**1ad**)*a* Promoted by R2NH/R2NH2+ in 70 mol % MeCN(aq) at 25.0 °C.

| Entry | [R2NH] *b,c*,*d*, M | *k*obs, s-1 *e,f* | | | |
| --- | --- | --- | --- | --- | --- |
| X = H (**1a**) | X = Cl (**1b**) | X = CF3 (**1c**) | X = NO2(**1d**) |
| 1 | 6.0 × 10-4 | 5.07 × 10-4 | 4.56 × 10-3 | 1.37 × 10-2 | 6.81 × 10-2 |
| 2 | 8.0 × 10-4 | 6.20 × 10-4 | 5.48 × 10-3 | 1.68 × 10-2 | 7.82 × 10-2 |
| 3 | 1.0 × 10-3 | 7.78 × 10-4 | 7.96 × 10-3 | 3.10 × 10-2 | 1.50 × 10-1 |
| 4 | 1.4 × 10-3 |  | 1.23 × 10-2 | 4.61 × 10-2 | 2.10 × 10-1 |
| 5 | 1.8 × 10-3 |  | 1.76 × 10-2 | 6.60 × 10-2 | 2.95 × 10-1 |
| 6 | 2.0 × 10-3 | 1.87 × 10-3 | 1.97 × 10-2 | 7.30 × 10-2 | 3.15 × 10-1 |
| 7 | 3.0 × 10-3 | - | 3.07 × 10-2 | 1.20 × 10-1 | 5.40 × 10-1 |
| 8 | 4.0 × 10-3 | 3.71 × 10-3 | 4.16 × 10-2 | 1.55 × 10-1 | - |
| 9 | 6.0 × 10-3 | 5.00 × 10-3 | 6.53 × 10-2 | 2.43 × 10-1 | - |
| 10 | 8.0 × 10-3 | 6.90 × 10-3 | 8.34 × 10-2 | 3.08 × 10-1 | - |
| 11 | 1.0 × 10-2 | - | 1.14 × 10-1 | 3.77 × 10-1 | - |
| 12 | 1.2 × 10-2 | 8.81 × 10-3 | - | - | - |
| 13 | 1.8 × 10-2 | 1.17 × 10-2 | - | - | - |
| 14 | 2.0 × 10-2 | - | 2.20 × 10-1 | - | - |
| 15 | 3.0 × 10-2 | 1.60 × 10-2 | 3.15 × 10-1 | - | - |
| 16 | 4.0 × 10-2 | 2.03 × 10-2 | - | - | - |
| 17 | 5.0 × 10-2 | 2.44 × 10-2 | - | - | - |
| 18 | 6.0 × 10-2 | 2.73 × 10-2 | - | - | - |
| 19 | 8.0 × 10-2 | 3.47 × 10-2 | - | - | - |
| 20 | 1.0 × 10-1 | 3.65 × 10-2 | - | - | - |
| 21 | 2.0 × 10-1 | 7.21 × 10-2 | - | - | - |

*a* [Substrate] = (3.0  5.0) × 10-5 M. *b* R2NH = Piperidine. *c* [R2NH]/[R2NH2+] = 1.0. *d*  = 0.10 M (Bu4N+Br-). *e* Average of three or more rate constants. *f* Estimated uncertainty,  5 %.

Table S5. Observed Rate Constants for Elimination from (4´-ClC6H4)2CHCO2C6H3-2-X-4-NO2 (**1ad**)*a* Promoted by R2NH/R2NH2+ in 70 mol % MeCN(aq) at 25.0 °C.

| entry | [R2NH] *b,c*,*d*, M | *k*obs, s-1 *e,f* | | | |
| --- | --- | --- | --- | --- | --- |
| X = H (**1a**) | X = Cl (**1b**) | X = CF3 (**1c**) | X = NO2(**1d**) |
| 1 | 6.0 × 10-4 | 2.26 × 10-3 | 2.60 × 10-2 | 7.81 × 10-2 | 1.64 × 10-1 |
| 2 | 8.0 × 10-4 | 3.28 × 10-3 | - | - | 2.46 × 10-1 |
| 3 | 1.0 × 10-3 | 5.45 × 10-3 | - | 1.72 × 10-1 | 3.36 × 10-1 |
| 4 | 1.4 × 10-3 | 7.71 × 10-3 | - | - | 4.91 × 10-1 |
| 5 | 1.8 × 10-3 | - | - | - | - |
| 6 | 2.0 × 10-3 | 1.32 × 10-2 | 1.35 × 10-1 | 4.00 × 10-1 | - |
| 7 | 3.0 × 10-3 | - | 2.04 × 10-1 | 6.15 × 10-1 | - |
| 8 | 4.0 × 10-3 | 2.91 × 10-2 | 3.00 × 10-1 | 7.92 × 10-1 | - |
| 9 | 6.0 × 10-3 | 4.51 × 10-2 | - | - | - |
| 10 | 8.0 × 10-3 | 6.06 × 10-2 | 5.30 × 10-1 | - | - |
| 11 | 1.0 × 10-2 | - | - | - | - |
| 12 | 1.2 × 10-2 | 8.54 × 10-2 | - | - | - |
| 13 | 1.8 × 10-2 | 1.22 × 10-1 | - | - | - |
| 14 | 2.0 × 10-2 | - | - | - | - |
| 15 | 3.0 × 10-2 | 2.00 × 10-1 | - | - | - |
| 16 | 4.0 × 10-2 | - | - | - | - |
| 17 | 5.0 × 10-2 | 3.20 × 10-1 | - | - | - |
| 18 | 6.0 × 10-2 | - | - | - | - |
| 19 | 8.0 × 10-2 | - | - | - | - |
| 20 | 1.0 × 10-1 | - | - | - | - |
| 21 | 2.0 × 10-1 | - | - | - | - |

*a* [Substrate] = (3.0  5.0) × 10-5 M.  *b* R2NH =Pyrrolidine.  *c* [R2NH]/[R2NH2+] = 1.0. *d*  = 0.10 M (Bu4N+Br-). *e* Average of three or more rate constants. *f* Estimated uncertainty,  5 %.

Figure S1. Plots of *k*obs vs base concentration for eliminations from (4´-ClC6H4)2CHCO2C6H3-2-CF3-4-NO2 (**1c**) promoted by R2NH/R2NH2+ in 70 mol % MeCN(aq) at 25 C, [R2NH]/[R2NH2+] = 1.0,  = 0.10 M (Bu4N+Br-). [R2NH = Morpholine (), Tetrahydroisoquinoline (), Piperidine (▲), Pyrrolidine (▼)].

Figure S2. Plots of *k*obs vs base concentration for eliminations from (4´-ClC6H4)2CHCO2C6H3-2-NO2-4-NO2 (**1d**) promoted by R2NH/R2NH2+ in 70 mol % MeCN(aq) at 25 C, [R2NH]/[R2NH2+] = 1.0,  = 0.10 M (Bu4N+Br-). [R2NH = Morpholine (), Tetrahydroisoquinoline (), Piperidine (▲), Pyrrolidine (▼)].

Figure S3. Plot of *k*obs vs base concentration for elimination from (4´-ClC6H4)2CHCO2C6H4-4-NO2 (**1a**) promoted by R2NH/R2NH2+ in 70 mol % MeCN(aq) at 25 C, R2NH]/[R2NH2+] = 1.0,  = 0.10 M (Bu4N+Br-), R2NH = Morpoline.

Figure S4. Plot of *k*obs vs base concentration for elimination from (4´-ClC6H4)2CHCO2C6H4-4-NO2 (**1a**) promoted by R2NH/R2NH2+ in 70 mol % MeCN(aq) at 25 C, [R2NH]/[R2NH2+] = 1.0,  = 0.10 M (Bu4N+Br-), R2NH = Tetrahydroisoquinoline.

Figure S5. Plot of *k*obs vs base concentration for elimination from (4´-ClC6H4)2CHCO2C6H4-4-NO2 (**1a**) promoted by R2NH/R2NH2+ in 70 mol % MeCN(aq) at 25 C, [R2NH]/[R2NH2+] = 1.0,  = 0.10 M (Bu4N+Br-), R2NH = Pyrrolidine.

Figure S6. Plot of *k*obs vs base concentration for elimination from (4´-ClC6H4)2CHCO2C6H4-4-NO2 (**1a**) promoted by R2NH/R2NH2+ in 70 mol % MeCN(aq) at 25 C, [R2NH]/[R2NH2+] = 0.5,  = 0.10 M (Bu4N+Br-), R2NH = Piperidine.

Figure S7. Plot of log *k*1 vs p*K*a of the buffers for the ketene-forming eliminations from (4´-ClC6H4)2CHCO2C6H4-4-NO2 (**1a**) promoted by R2NH/R2NH2+ in 70 mol % MeCN(aq) at 25 C.

Figure S8. Plot of log *k*-1/*k*2 vs p*K*a of the buffers for the ketene-forming eliminations from (4´-ClC6H4)2CHCO2C6H4-4-NO2 (**1a**) promoted by R2NH/R2NH2+ in 70 mol % MeCN(aq) at 25 C.
